# Supplementary material for: Association of Polyvascular Disease and Elevated Interleukin-6 With Outcomes in Acute Ischemic Stroke or Transient Ischemic Attack
Source: PubMed Central journal article supplement (PMC8076541; doi:10.3389/fneur.2021.661779), 2021-04-13
Supplement: Table_1.pdf [file Table_1.pdf]

**Supplementary Table 1. Comparison between patients included and patients excluded.**

| <b>Characteristics</b>                   | <b>Patients included<br/>(n=10773)</b> | <b>Patients excluded<br/>(n=4393)</b> | <b>P-value</b> |
|------------------------------------------|----------------------------------------|---------------------------------------|----------------|
| Age (mean±SD), y                         | 62.28±11.31                            | 62.11±11.29                           | 0.3934         |
| Male sex, n (%)                          | 7376 (68.47)                           | 2988 (68.02)                          | 0.5888         |
| Education                                |                                        |                                       | <0.0001        |
| Elementary or below                      | 2919 (27.10)                           | 1373 (31.25)                          |                |
| Middle school                            | 3158 (29.31)                           | 1247 (28.39)                          |                |
| High school or above                     | 3188 (29.59)                           | 1094 (24.90)                          |                |
| Unknown                                  | 1508 (14.00)                           | 679 (15.46)                           |                |
| Current smoking                          | 3404 (31.60)                           | 3045 (69.31)                          | 0.2719         |
| Heavy drinking                           | 1531 (14.21)                           | 595 (13.54)                           | 0.2830         |
| Hypertension                             | 6743 (62.59)                           | 2751 (62.62)                          | 0.9717         |
| Diabetes mellitus                        | 2586 (24.00)                           | 924 (21.03)                           | <0.0001        |
| Dyslipidemia                             | 905 (8.40)                             | 286 (6.51)                            | <0.0001        |
| Atrial fibrillation                      | 762 (7.07)                             | 257 (5.85)                            | 0.0064         |
| Previous ischemic stroke                 | 2432 (22.57)                           | 923 (21.01)                           | 0.0353         |
| Infection, n (%)                         | 308 (2.86)                             | 142 (3.23)                            | 0.1081         |
| NIHSS score at admission,<br>median(IQR) | 3 (1–6)                                | 3 (1–6)                               | 0.0083         |
| Subtype of stroke (TOAST )               |                                        |                                       | 0.0352         |
| LAA                                      | 2692 (24.99)                           | 1164 (26.50)                          |                |
| CE                                       | 684 (6.35)                             | 233 (5.30)                            |                |
| SVO                                      | 2258 (20.96)                           | 907 (20.65)                           |                |
| Other causes                             | 5139 (47.70)                           | 2089 (47.55)                          |                |
| Medication at admission, n<br>(%)        |                                        |                                       |                |
| Antihypertensive drugs                   | 4886 (45.35)                           | 1909 (43.46)                          | 0.0329         |
| Glucose-lowing drugs                     | 2023 (18.78)                           | 750 (17.07)                           | 0.0137         |
| Antiplatelet drugs                       | 1938 (17.99)                           | 667 (15.18)                           | <0.0001        |
| Lipid-lowing drugs                       | 1262 (11.71)                           | 409 (9.31)                            | <0.0001        |
| Blood pressure at admission              |                                        |                                       |                |
| SBP (mmHg)                               | 148.50 (135.00–164.00)                 | 148.00 (135.00–162.5)                 | 0.2762         |
| DBP (mmHg)                               | 86.50 (79.00–95.00)                    | 86.00 (79.00–95.50)                   | 0.7418         |
| BMI (IQR)                                | 24.49 (22.58–26.57)                    | 24.49 (22.68–26.44)                   | 0.8521         |
| Biochemical markers,<br>median (IQR)     |                                        |                                       |                |
| Glucose(mmol/L)                          | 5.53 (4.90–6.90)                       | 5.50 (4.88–6.86)                      | 0.1774         |
| TC (mmol/L)                              | 4.00 (3.34–4.77)                       | 4.49 (3.81–5.25)                      | <0.0001        |
| TG (mmol/L)                              | 1.37 (1.03–1.89)                       | 1.39 (1.01–1.96)                      | 0.2894         |

---

|              |                  |                  |         |
|--------------|------------------|------------------|---------|
| LDL (mmol/L) | 2.35 (1.75–3.01) | 2.70 (2.12–3.32) | <0.0001 |
| HDL (mmol/L) | 1.08 (0.90–1.28) | 1.10 (0.93–1.32) | <0.0001 |

---

Abbreviations: IQR, interquartile range; NHISS, National Institutes of Health Stroke Scale; TOAST, Trial of Org 10172 in Acute Stroke Treatment; LAA, large artery atherosclerosis; CE, cardioembolism; SVO, small-vessel occlusion; SBP, systolic blood pressure; DBP, diastolic blood pressure; BMI, body mass index; TC, total cholesterol; TG, triglyceride; LDL, low-density lipoprotein; HDL, high-density lipoprotein.
